## 22 **Abstract**

23 The ability to parse a complex auditory scene into perceptual objects is facilitated  
24 by a hierarchical auditory system. Successive stages in the hierarchy transform an  
25 auditory scene of multiple overlapping sources, from peripheral tonotopically-  
26 based representations in the auditory nerve, into perceptually distinct auditory-  
27 objects based representation in auditory cortex. Here, using magnetoencephalo-  
28 graphy (MEG) recordings from human subjects, we investigate how a complex  
29 acoustic scene consisting of multiple speech sources is represented in distinct  
30 hierarchical stages of auditory cortex. Using systems-theoretic methods of  
31 stimulus reconstruction, we show that the primary-like areas in auditory cortex  
32 contain dominantly spectro-temporal based representations of the entire auditory  
33 scene. Here, both attended and ignored speech streams are represented with almost  
34 equal fidelity, and a global representation of the full auditory scene with all its  
35 streams is a better candidate neural representation than that of individual streams  
36 being represented separately. In contrast, we also show that higher order auditory  
37 cortical areas represent the attended stream separately, and with significantly  
38 higher fidelity, than unattended streams. Furthermore, the unattended background  
39 streams are more faithfully represented as a single unsegregated background  
40 object rather than as separated objects. Taken together, these findings demonstrate  
41 the progression of the representations and processing of a complex acoustic scene  
42 up through the hierarchy of human auditory cortex.

43 **Significance Statement:**

44 Using magnetoencephalography (MEG) recordings from human listeners in a  
45 simulated cocktail party environment, we investigate how a complex acoustic  
46 scene consisting of multiple speech sources is represented in separate hierarchical  
47 stages of auditory cortex. We show that the primary-like areas in auditory cortex  
48 use a dominantly spectro-temporal based representation of the entire auditory  
49 scene, with both attended and ignored speech streams represented with almost  
50 equal fidelity. In contrast, we show that higher order auditory cortical areas  
51 represent an attended speech stream separately from, and with significantly higher  
52 fidelity than, unattended speech streams. Furthermore, the unattended background  
53 streams are represented as a single undivided background object rather than as  
54 distinct background objects.  
55

## 56 **Introduction**

57 Individual sounds originating from multiple sources in a complex auditory scene  
58 mix linearly and irreversibly before they enter the ear, yet are perceived as distinct  
59 objects by the listener (Cherry, 1953; Bregman, 1994; McDermott, 2009). The  
60 separation, or rather individual re-creation, of such linearly mixed original sound  
61 sources is a mathematically ill-posed question, yet the brain nevertheless routinely  
62 performs this task with ease. The neural mechanisms by which this perceptual ‘un-  
63 mixing’ of sounds occur, the collective cortical representations of the auditory  
64 scene and its constituents, and the role of attention in both, are key problems in  
65 contemporary auditory neuroscience.

66 It is known that auditory processing in primate cortex is hierarchical (Davis  
67 and Johnsrude, 2003; Hickok and Poeppel, 2007; Rauschecker and Scott, 2009;  
68 Okada et al., 2010; Peelle et al., 2010; Overath et al., 2015) with subcortical areas  
69 projecting onto the core areas of auditory cortex, and from there, on to belt,  
70 parabelt and additional auditory areas (Kaas and Hackett, 2000). Sound entering  
71 the ear reaches different anatomical/functional areas of auditory cortex with  
72 different latencies (Recanzone et al., 2000; Nourski et al., 2014). Due to this serial  
73 component of auditory processing, the hierarchy of processing can be described by  
74 both anatomy and latency, of which the latter may be exploited using the high

75 temporal fidelity of non-invasive magnetoencephalography (MEG) neural  
76 recordings.

77 In selective listening experiments using natural speech and MEG, the two  
78 major neural responses known to track the speech envelope are the M50<sub>TRF</sub> and  
79 M100<sub>TRF</sub>, with respective latencies of 30 – 80 ms and 80 – 150 ms, of which the  
80 dominant neural sources are, respectively, Heschl's gyrus (HG) and Planum  
81 temporale (PT) (Steinschneider et al., 2011; Ding and Simon, 2012b).  
82 Posteromedial HG is the site of core auditory cortex; PT contains both belt and  
83 parabelt auditory areas (here collectively referred to as higher-order areas)  
84 (Griffiths and Warren, 2002; Sweet et al., 2005). Hence the earlier neural  
85 responses are dominated by core auditory cortex, and the later are dominated by  
86 higher-order areas. To better understand the neural mechanisms of auditory scene  
87 analysis, it is essential to understand how the cortical representations of a complex  
88 auditory scene change from the core to the higher order auditory areas.

89 One topic of interest is whether the brain maintains distinct neural  
90 representations for each unattended source (in addition to the representation of the  
91 attended source), or if all unattended sources are represented collectively as a  
92 single monolithic background object. A common paradigm used to investigate the  
93 neural mechanisms underlying auditory scene analysis employs a pair of speech  
94 streams, of which one is attended, which then leaves the other speech stream

95 remaining as the background (Kerlin et al., 2010; Ding and Simon, 2012b;  
96 Mesgarani and Chang, 2012; Power et al., 2012; Zion Golumbic et al., 2013b;  
97 O'Sullivan et al., 2015). This results in a limitation, which cannot address the  
98 question of distinct vs. collective neural representations for unattended sources.  
99 This touches on the long-standing debate of whether auditory object segregation is  
100 pre-attentive or it is actively influenced by attention (Carlyon, 2004; Sussman et  
101 al., 2005; Shinn-Cunningham, 2008; Shamma et al., 2011). Evidence for  
102 segregated neural representations of background streams would support the  
103 former, whereas a lack of segregated background objects would support the latter.

104 To address these issues, we use MEG to investigate a variety of potential  
105 cortical representations of the elements of a multi-talker auditory scene. We test  
106 two major hypotheses: that the dominant representation in core auditory cortex is  
107 of the physical acoustics, not of separated auditory objects; and that once object-  
108 based representations emerge in higher order auditory areas, the unattended  
109 contributions to the auditory scene are represented collectively as a single  
110 background object. The methodological approach employs the linear systems  
111 methods of stimulus prediction and MEG response reconstruction (Lalor et al.,  
112 2009; Mesgarani et al., 2009; Ding and Simon, 2012b; Mesgarani and Chang,  
113 2012; Pasley et al., 2012; Di Liberto et al., 2015).

114

115 **Materials & Methods:**

116 *Subjects & Experimental Design* Nine normal-hearing, young adults (6 Female)  
117 participated in the experiment. All subjects were paid for their participation. The  
118 experimental procedures were approved by the University of Maryland  
119 Institutional Review Board. Subjects listened to a mixture of three speech  
120 segments spoken by, respectively, a male adult, female adult and a child speaker.  
121 The three speech segments were mixed into a single audio channel with equal  
122 perceptual loudness. All three speech segments were taken from public domain  
123 narration of Grimms' Fairy Tales by Jacob & Wilhelm Grimm  
124 (<https://librivox.org/fairy-tales-by-the-brothers-grimm/>). Periods of silence longer  
125 than 300 ms were replaced by a shorter gap whose duration was chosen randomly  
126 between 200 ms and 300 ms. The audio signal was low-pass filtered below 4 kHz.  
127 In first of three conditions, the subjects were asked to attend to the child speaker,  
128 while ignoring the other two (i.e., child speaker as target, with male and female  
129 adult speakers as background). In condition two, during which the same mixture  
130 was played as in condition one, the subjects were instead asked to attend to the  
131 male adult speaker (with female adult and child speakers as background).  
132 Similarly, in condition three, the target was switched to the female adult speaker.  
133 Each condition was repeated three times successively, producing three trials per  
134 condition. The presentation order of the three conditions was counterbalanced

135 across subjects. Each trial was of 220 s duration, divided into two 110 s sections,  
136 to reduce listener fatigue. To help participants attend to the correct speaker, the  
137 first 30 s of each section was replaced by the clean recording of the target speaker  
138 alone, followed by a 5 s upward linear ramp of the background speakers.  
139 Recordings of this first 35 s of each segment were not included in any analysis. To  
140 further encourage the subjects to attend to the correct speaker, a target-word was  
141 set before each trial and the subjects were asked to count the number of  
142 occurrences of the target-word in the speech of the attended speaker. Additionally,  
143 after each condition, the subject was asked to recount a short summary of the  
144 attended narrative. The subjects were required to close their eyes while listening.  
145 Before the main experiment, 100 repetitions of a 500-Hz tone pip were presented  
146 to each subject to elicit the M100 response, a reliable auditory response occurring  
147 ~100 ms after the onset of a tone pip. This data was used check whether any  
148 potential subjects gave abnormal auditory responses, but no subjects were  
149 excluded based on this criterion.

150

151 ***Data recording and pre-processing*** MEG recordings were conducted using a 160-  
152 channel whole-head system (Kanazawa Institute of Technology, Kanazawa,  
153 Japan). Its detection coils are arranged in a uniform array on a helmet-shaped  
154 surface of the bottom of the dewar, with ~25 mm between the centers of two



155 adjacent 15.5-mm-diameter coils. Sensors are configured as first-order axial  
156 gradiometers with a baseline of 50 mm; their field sensitivities are  $5 \text{ fT}/\sqrt{\text{Hz}}$  or  
157 better in the white noise region. Subjects lay horizontally in a dimly lit  
158 magnetically shielded room (Yokogawa Electric Corporation). Responses were  
159 recorded with a sampling rate of 1 kHz with an online 200-Hz low-pass filter and  
160 60 Hz notch filter. Three reference magnetic sensors and three vibrational sensors  
161 were used to measure the environmental magnetic field and vibrations. The  
162 reference sensor recordings were utilized to reduce environmental noise from the  
163 MEG recordings using the Time-Shift PCA method (de Cheveigne and Simon,  
164 2007). Additionally, MEG recordings were decomposed into virtual sensors/  
165 components using denoising source separation (DSS) (Särelä and Valpola, 2005;  
166 de Cheveigne and Simon, 2008; de Cheveigne and Parra, 2014), a blind source  
167 separation method that enhances neural activity consistent over trials. Specifically,  
168 DSS decomposes the multichannel MEG recording into temporally uncorrelated  
169 components, where each component is determined by maximizing its trial-to-trial  
170 reliability, measured by the correlation between the responses to the same stimulus  
171 in different trials. To reduce the computational complexity, for all further analysis  
172 the 157 MEG sensors were reduced, using DSS, to 4 components in each  
173 hemisphere. Also, both stimulus envelope and MEG responses were band pass

174 filtered between 1 – 8 Hz (delta and theta bands), which correspond to the slow  
175 temporal modulations in speech (Ding and Simon, 2012a, b).

176

177 ***Terminology and Notation*** As specified in the stimulus description, in each  
178 condition the subject attends to one among the three speech streams. The envelope  
179 of attended speech stream is referred to as the ‘foreground’ and the envelope of  
180 each of the two unattended speech streams is referred to as the ‘individual  
181 background’. In contrast, the envelope of the entire unattended part of the  
182 stimulus, comprising *both* unattended speech streams, is referred to as the  
183 ‘combined background’. The envelope of entire acoustic stimulus or auditory  
184 scene, comprising of all the three speech streams is referred to as the ‘acoustic  
185 scene’. Thus, if  $S_a, S_b, S_c$  are three speech stimuli,  $Env(S_a + S_b + S_c)$  is the  
186 acoustic scene. In contrast, the sum of envelopes of three speech streams,  
187  $Env(S_a) + Env(S_b) + Env(S_c)$ , is referred to as the ‘sum of streams’, and the  
188 two are not mathematically equal: even though both are functions of the same  
189 stimuli, they differ due to the non-linear nature of a signal envelope (the linear  
190 correlation between the acoustic scene and the sum of streams is typically  $\sim 0.75$ ).

191 Neural responses with latencies less than  $\sim 85$  ms (typically originating  
192 from core auditory areas) are referred to here as ‘early neural responses’ and  
193 responses with latencies more than  $\sim 85$  ms (typically from higher-order auditory

194 areas) (Ahveninen et al., 2011; Okamoto et al., 2011; Steinschneider et al., 2011)  
195 are referred to as ‘late neural responses’.

196

197 **Temporal Response Function** In an auditory scene with a single talker, the  
198 relation between MEG neural response and the presented speech stimuli can be  
199 modeled using a linear temporal response function (TRF) as

$$r(t) = \sum_{\tau} s(t - \tau)TRF(\tau) + \epsilon(t) \quad (1)$$

200 where  $t = 0, 1, \dots, T$  is time,  $r(t)$  is the response from any individual sensor or  
201 DSS component,  $s(t)$  is the stimulus envelope in decibels,  $TRF(t)$  is the TRF  
202 itself, and  $\epsilon(t)$  is residual response waveform not explained by the TRF model  
203 (Ding and Simon, 2012a). The envelope is extracted by averaging the auditory  
204 spectrogram, (Chi et al., 2005) along the spectral dimension. The TRF is estimated  
205 using boosting with 10-fold cross-validation (David et al., 2007). In case of single  
206 speech stimuli, the TRF is typically characterized by a positive peak between 30  
207 ms and 80 ms and a negative peak between 90 ms and 130 ms, referred to as  
208  $M50_{TRF}$  and  $M100_{TRF}$  respectively (Ding and Simon, 2012b) (positivity/negativity  
209 of the magnetic field is by convention defined to agree with the corresponding  
210 electroencephalography[EEG] peaks). Success/accuracy of the linear model is  
211 evaluated by how well it predicts neural responses, as measured by the proportion

212 of the variance explained: the square of the Pearson correlation coefficient  
213 between the MEG measurement and the TRF model prediction.

214 In the case of more than one speaker, the MEG neural response,  $r(t)$  can be  
215 modeled as the sum of the responses to the individual acoustic sources (Ding and  
216 Simon, 2012b; Zion Golumbic et al., 2013b), referred to here as the 'Summation  
217 model'. For example, with two speech streams, the neural response would be  
218 modeled as

$$r(t) = \sum_{\tau} S_a(t - \tau)TRF_a(\tau) + \sum_{\tau} S_b(t - \tau)TRF_b(\tau) + \varepsilon(t) \quad (2)$$

219  
220 where  $S_a(t)$  and  $S_b(t)$  are the envelopes of the two speech streams, and  $TRF_a(t)$ ,  
221 and  $TRF_b(t)$  are the TRFs corresponding to each stream. The summation model is  
222 easily extended to the case of more than two speech streams, by adding new terms  
223 with each new individual speech stream envelope and the corresponding TRF.

224 In addition to the existing summation model, we propose a new encoding-  
225 model referred to as the 'Early-late model', which allows one to incorporate the  
226 hypothesis that the early neural responses typically represent the entire acoustic  
227 scene, but that the later neural responses differentially represent the separated  
228 foreground and background.

$$r(t) = \sum_{\tau=0}^{\tau=\tau_1} S_A(t - \tau)TRF_A(\tau) + \sum_{\tau=\tau_1}^{\tau=\tau_2} S_F(t - \tau)TRF_F(\tau) + \sum_{\tau=\tau_1}^{\tau=\tau_2} S_B(t - \tau)TRF_B(\tau) + \varepsilon(t) \quad (3)$$

229

230 where  $S_A(t)$  is the (entire) acoustic scene,  $S_F(t)$  is the envelope of attended  
231 (foreground) speech stream, and  $S_B(t)$  is the combined background (i.e., envelope  
232 of everything other than attended speech stream in the auditory scene), and  
233  $TRF_A(t)$ ,  $TRF_F(t)$ , and  $TRF_B(t)$  are the corresponding TRFs.  $\tau_1, \tau_2$  represent the  
234 boundary values of the integration windows for early and late neural responses  
235 respectively.

236 The explanatory power of different models, such as the Summation and  
237 Early-late models, can be ranked by comparing the accuracy of their response  
238 predictions (illustrated in Figure 1, left).

239

240 (Figure 1 about here)

241

242 ***Decoding speech from neural responses*** While the TRF/encoding analysis  
243 described in the previous section predicts neural response from the stimulus,  
244 decoding analysis reconstructs the stimulus based on the neural response. Thus,  
245 decoding analysis complements the TRF analysis (Mesgarani et al., 2009).  
246 Mathematically the envelope reconstruction/decoding operation can be formulated  
247 as

$$E(t) = \sum_{k=1}^N \sum_{\tau=\tau_b}^{\tau_e} M_k(t + \tau) D_k(\tau) + \epsilon(t) \quad (4)$$

248

249 where  $E(t)$  is the reconstructed envelope,  $M_k(t)$  is the MEG recording (neural  
250 response) from sensor/component  $k$ , and  $D_k(t)$  is the linear decoder for  
251 sensor/component  $k$ . The times  $\tau_b$  and  $\tau_e$  denote the beginning and end times of  
252 the integration window. By appropriately choosing the values of  $\tau_b$  and  $\tau_e$ ,  
253 envelope reconstructions using neural responses from any desired time window  
254 can be compared. The decoder is estimated using boosting analogously to the TRF  
255 estimation in the previous section. In the single talker case the envelope is of that  
256 talker's speech. In a multi-talker case, the envelope to be reconstructed might be  
257 the envelope of the speech of attended talker, or one of the background talkers, or  
258 of a mixture of any two or all three talkers, depending on the model under  
259 consideration. Chance-level reconstruction (i.e., the noise floor) from a particular  
260 neural response is estimated by reconstructing an unrelated stimulus envelope  
261 from that neural response. Figure 2 illustrates the distinction between  
262 reconstruction of stimulus envelope from early and late responses. The stimulus  
263 envelope at time point  $t$  can be reconstructed using neural responses from the  
264 dashed (early response) window or dotted (late response) window. (While it is true  
265 that the late responses to the stimulus at time point  $t - \Delta t$  overlap with early  
266 responses to the stimulus at time point  $t$ , the decoder used to reconstruct the  
267 stimulus at time point  $t$  from early responses is only minimally affected by late  
268 responses to the stimulus at time point  $t - \Delta t$  when the decoder is estimated by

269 averaging over a long enough duration, e.g., tens of seconds). The cut-off time  
270 between early and late responses,  $\tau_{boundary}$ , was chosen to minimize the overlap  
271 between the M50<sub>TRF</sub> and M100<sub>TRF</sub> peaks, on a per subject basis, with a typical  
272 value being 85 ms. When decoding from early responses only, the time window of  
273 integration is from  $\tau_b = 0$  to  $\tau_e = \tau_{boundary}$ . When decoding from late neural  
274 responses only, the time window of integration is from  $\tau_b = \tau_{boundary}$  to  $\tau_e =$   
275 500 ms.

276

277 (Figure 2 about here)

278

279 The robustness of different representations, such as of Foreground vs.  
280 Background, can be compared by examining the accuracy of their respective  
281 stimulus envelope reconstructions (illustrated in Figure 1, right).

282

283 **Statistics** All statistical comparisons reported here are two-tailed permutation tests  
284 with  $N=1,000,000$  random permutations (within subject). Due to the value of  $N$   
285 selected, the smallest accurate  $p$  value that can be reported is  $2 \times 1/N (= 2 \times 10^{-6}$ ; the  
286 factor of 2 arises from the two-tailed test) and any  $p$  value smaller than  $2/N$  is  
287 reported as  $p < 2 \times 10^{-6}$ . The statistical comparison between foreground and  
288 individual backgrounds requires special mention, since each listening condition

289 has one foreground but two individual backgrounds. From the perspective of both  
290 behavior and task, both the individual backgrounds are interchangeable. Hence,  
291 when comparing reconstruction accuracy of foreground vs. individual background  
292 the average reconstruction accuracy of the two individual backgrounds is used.  
293 Finally, Bayes factor analysis is used, when appropriate, to evaluate evidence in  
294 favor of null hypothesis, since conventional hypothesis testing is not suitable for  
295 such purposes. Briefly, Bayes factor analysis calculates the *posterior odds* i.e., the  
296 ratio of  $P(H_0|observations)$  to  $P(H_1|observations)$ , where  $H_0$  and  $H_1$  are the null  
297 and alternate hypotheses respectively.

$$\frac{P(H_0|observations)}{P(H_1|observations)} = \frac{P(observations|H_0)}{P(observations|H_1)} \times \frac{P(H_0)}{P(H_1)} \quad (5)$$

$$= BF_{01} \times \frac{P(H_0)}{P(H_1)} \quad (6)$$

298 The ratio of  $P(observations|H_0)$  and  $P(observations|H_1)$  is denoted as the Bayes  
299 factor,  $BF_{01}$ . Then, under the assumption of equal priors ( $P(H_0) = P(H_1)$ ), the  
300 posterior odds reduces to  $BF_{01}$ . A  $BF_{01}$  value of 10 indicates that the data is ten  
301 times more likely to occur under the null hypothesis than the alternate hypothesis;  
302 conversely, a  $BF_{01}$  value of 0.1 indicates that the data is 10 times more likely to  
303 occur under the alternate hypothesis than the null hypothesis. Conventionally, a  
304  $BF_{01}$  value between 3 and 10 is considered as moderate evidence in favor of the



305 null hypothesis, and a value between 10 and 30 is considered strong evidence;  
306 conversely, a  $BF_{01}$  value between 1/3 & 1/10 (respectively 1/10 & 1/30) is  
307 considered moderate (respectively strong) evidence for the alternate hypothesis  
308 (for more details we refer the reader to Rouder et al. (2009)).

309

## 310 **Results**

### 311 *Stimulus reconstruction from early neural responses*

312 To investigate the neural representations of the attended vs. unattended speech  
313 streams associated with early auditory areas, i.e., from core auditory cortex,  
314 (Nourski et al., 2014), the temporal envelope of attended (foreground) and  
315 unattended speech streams (individual backgrounds) were reconstructed using  
316 decoders optimized individually for each speech stream. All reconstructions  
317 performed significantly better than chance level (foreground vs. noise,  $p < 2 \times 10^{-6}$ ;  
318 individual background vs. noise,  $p < 2 \times 10^{-6}$ ), indicating that all three speech  
319 streams are represented in early auditory cortex. Figure 3A shows reconstruction  
320 accuracy for foreground vs. individual backgrounds. A permutation test shows no  
321 significant difference between foreground and individual background ( $p = 0.21$ ),  
322 indicating that there is no evidence of significant neural bias for the attended  
323 speech stream over the ignored speech stream, in early neural responses. In fact,  
324 Bayes Factor analysis ( $BF_{01} = 4.2$ ) indicates moderate support in favor of the null

325 hypothesis (Rouder et al., 2009), that early neural responses do not distinguish  
326 significantly between attended and ignored speech streams.

327

328 (Figure 3 about here)

329

330 To test the hypothesis that early auditory areas represent the auditory scene  
331 in terms of acoustics, rather than as individual auditory objects, we reconstructed  
332 the acoustic scene (the envelope of the sum of all three speech streams) and  
333 compared it against the reconstruction of the sum of streams (sum of  
334 reconstruction envelopes of each of the three individual speech streams). Separate  
335 decoders optimized individually were used to reconstruct the acoustic scene and  
336 the sum of streams. As can be seen in Figure 3B, the result shows that the acoustic  
337 scene is better reconstructed than the sum of streams ( $p < 2 \times 10^{-6}$ ). This indicates  
338 that early auditory cortex is better described as processing the entire acoustic scene  
339 rather than processing the separate elements of the scene individually.

340

#### 341 ***Stimulus reconstruction from late neural responses***

342 While the preceding results were based on early cortical processing, the following  
343 results are based on late auditory cortical processing (responses with latencies  
344 more than ~85 ms). Figure 4A shows the scatter plot of reconstruction accuracy

345 for the foreground vs. individual background envelopes based on late responses. A  
346 paired permutation test shows that reconstruction accuracy for the foreground is  
347 significantly higher than the background ( $p < 2 \times 10^{-6}$ ). Even though the individual  
348 backgrounds are not as reliably reconstructed as foreground, their reconstructions  
349 are nonetheless significantly better than chance level ( $p < 2 \times 10^{-6}$ ).

350 In order to distinguish among possible neural representations of the  
351 background streams, we compared the reconstructability of the envelope of the  
352 entire background as a whole, with the reconstructability of the sum of the  
353 envelopes of the (two) backgrounds. If the background is represented as a single  
354 auditory object (i.e., “the background”), the reconstruction of the envelope of the  
355 entire background should be more faithful than the sum of envelopes of individual  
356 backgrounds. In contrast, if the background is represented as distinct auditory  
357 objects, each distinguished by its own envelope, the reconstruction of the sum of  
358 envelopes of the individual backgrounds should be more faithful. Figure 4B shows  
359 the scatter plot of reconstruction accuracy for the envelope of combined  
360 background vs. the sum of the envelopes of the individual background streams.  
361 Analysis shows that the envelope of the combined background is significantly  
362 better represented than the sum of the individual envelopes of the individual  
363 backgrounds ( $p = 0.012$ ). As noted previously, the envelope of the combined  
364 background is actually strongly correlated with the sum of the envelopes of the

365 individual backgrounds, meaning that finding a significant difference in their  
366 reconstruction accuracy is *a priori* unlikely, providing even more credence to the  
367 result.

368

369 (Figure 4 about here)

370

### 371 ***Encoding analysis***

372 Results above from envelope reconstruction suggest that while early neural  
373 responses represent the auditory scene in terms of the acoustics, the later neural  
374 responses represent the auditory scene in terms of a separated foreground and a  
375 single background stream. In order to further test this hypothesis, we use TRF-  
376 based encoding analysis to directly compare two different models of auditory  
377 scene representations. The two models compared are the standard Summation  
378 model (based on parallel representations of all speech streams; see Equation 2) and  
379 the new Early-late model (based on an early representation of the entire acoustic  
380 scene and late representations of separated foreground and background; see  
381 Equation 3). Figure 5 shows the response prediction accuracies for the two  
382 models. A permutation test shows that the accuracy of the Early-late model is  
383 considerably higher than that of the Summation model ( $p < 2 \times 10^{-6}$ ). This indicates  
384 that a model in which early/core auditory cortex processes the entire acoustic

385 scene but later/higher-order auditory cortex processes the foreground and  
386 background separately has more support than the previously employed model of  
387 parallel processing of separate streams throughout auditory cortex.

388

389 (Figure 5 about here)

## 390 **Discussion**

391 In this study, we used cortical tracking of continuous speech, in a multi-talker  
392 scenario, to investigate the neural representations of an auditory scene. Differing  
393 latencies of the neural sources processing the same stimuli allow us to separate the  
394 source activity temporally, thus enabling the tracking of differing neural  
395 representations of the auditory scene. From MEG recordings of subjects  
396 selectively attending to one of the three co-located speech streams, we observed  
397 that 1) The early neural responses (with short latencies), which originate primarily  
398 from core auditory cortex, represent the foreground (attended) and background  
399 (ignored) speech streams without any significant difference, whereas the late  
400 neural responses (with longer latencies), which originate primarily from higher-  
401 order areas of auditory cortex, represent the foreground with significantly higher  
402 fidelity than the background; 2) Early neural responses are not only balanced in  
403 how they represent the constituent speech streams, but in fact represent the entire

404 acoustic scene holistically, rather than as separately contributing individual  
405 perceptual objects; 3) Even though there are two physical speech streams in the  
406 background, no neural segregation is observed for the background speech streams.

407         It is well established that auditory processing in cortex is performed in a  
408 hierarchical fashion, in which an auditory stimulus is processed by different  
409 anatomical areas at different latencies (Inui et al., 2006; Nourski et al., 2014).  
410 Using this idea to inform the neural decoding/encoding analysis allows the  
411 effective isolation of neural signals from a particular cortical area, and thereby the  
412 ability to track changes in neural representations as the stimulus processing  
413 proceeds along the auditory hierarchy. This time-constrained  
414 reconstruction/prediction approach may prove especially fruitful in high-time-  
415 resolution/low-spatial-resolution imaging techniques such as MEG and EEG. Even  
416 though different response components are generated by different neural sources,  
417 standard neural source localization algorithms may perform poorly when different  
418 sources are strongly correlated in their responses (Lutkenhoner and Mosher,  
419 2007). While the proposed method is not to be viewed as an alternative to source  
420 localization methods, it can nonetheless be used to tease apart different  
421 components of MEG/EEG response, without explicit source localization.

422         The envelope reconstruction using the early, auditory core, neural response  
423 component showed no significant difference between foreground and background,

424 in contrast to reconstruction using the late, higher-order auditory, neural  
425 responses, where the foreground is substantially better represented than any  
426 individual background. This *decoding* result is in agreement with the *encoding*  
427 result of (Ding and Simon, 2012b) where the authors showed that the early  
428 M50<sub>TRF</sub> component of the temporal response function is not significantly  
429 modulated by attention, whereas the late M100<sub>TRF</sub> component is modulated by  
430 attention.

431       Even though there is no significant difference between the ability to  
432 reconstruct the foreground and background from early neural responses,  
433 nonetheless we observe a non-significant tendency towards an enhanced  
434 representation of the foreground (foreground > background,  $p = 0.21$ ). This could  
435 be due to task-related plasticity of spectro-temporal receptive fields of neurons in  
436 mammalian primary auditory cortex (Fritz et al., 2003), where the receptive fields  
437 of neurons are tuned to match the stimulus characteristics of attended sounds. It  
438 could also be explained by entrainment (Schroeder and Lakatos, 2009; Zion  
439 Golumbic et al., 2012), which postulates that the high excitability periods of  
440 neurons become aligned with temporal structure of foreground, thereby enhancing  
441 its neural representation.

442       The increase in fidelity of the foreground as the response latency increases,  
443 from early neural responses (from core auditory cortex) to late neural responses

444 (from higher-order auditory cortex), indicates a temporal as well as functional  
445 hierarchy in cortical processing of auditory scene, from core to higher-order areas  
446 in auditory cortex. Similar preferential representation for the attended speech  
447 stream has been demonstrated, albeit with only two speech streams, using delta  
448 and theta band neural responses (Ding and Simon, 2012b; Zion Golumbic et al.,  
449 2013a; Zion Golumbic et al., 2013b) as well as high-gamma neural responses  
450 (Mesgarani and Chang, 2012; Zion Golumbic et al., 2013a), and using monaural  
451 (Ding and Simon, 2012b; Mesgarani and Chang, 2012) as well as audio-visual  
452 speech (Zion Golumbic et al., 2013a; Zion Golumbic et al., 2013b).

453         While some researchers suggest a selective entrainment model (Schroeder  
454 and Lakatos, 2009; Ng et al., 2012; Zion Golumbic et al., 2013b; Kayser et al.,  
455 2015) as the mechanism underlying the selective tracking of attended speech,  
456 others suggest a temporal coherence model (Shamma et al., 2011; Ding and  
457 Simon, 2012b) as the neuronal mechanism underlying selective tracking. Natural  
458 speech is quasi-rhythmic with different dominant rates at syllabic, word and  
459 prosodic frequencies. The selective entrainment model suggests that attention  
460 causes endogenous low frequency neural oscillations to align with the temporal  
461 structure of the attended speech stream, thus aligning the high excitability phases  
462 of oscillations with events in attended stream. This effectively forms a mask that  
463 favors the attended speech. The temporal coherence model suggests that selective



464 tracking of attended speech is achieved through two stages. First is a cortical  
465 filtering stage, where feature selective neurons filter the stimulus producing a  
466 multidimensional representation of auditory scene along different feature axes.  
467 This is followed by a second stage, coherence analysis, which combines different  
468 features streams based on their temporal similarity, giving rise to separate  
469 perceptions of attended and ignored streams.

470         The representation of an auditory scene in core auditory cortex is here  
471 shown to be more spectro-temporal- or acoustic-based than object-based, as  
472 demonstrated by the result that the envelope of the auditory scene is better  
473 reconstructed than the sum of envelopes of the individual speech streams (e.g.,  
474 Figure 3B). This is further supported by the result that the Early-late model  
475 predicts MEG neural responses significantly better than Summation model (e.g.,  
476 Figure 5). This is consistent with previous studies that demonstrated that neural  
477 activity in core auditory cortex was highly sensitive to acoustic characteristics of  
478 speech and primarily reflects spectro-temporal attributes of sound (Nourski et al.,  
479 2009; Okada et al., 2010; Steinschneider et al., 2014). All these results suggest that  
480 early neural responses, primarily from core auditory cortex, reflect an acoustic-  
481 based representation rather than object-based. In contrast, Nelken and Bar-Yosef  
482 (2008) suggest that neural auditory objects may form as early as primary auditory  
483 cortex, and Fritz et al. (2003) show that representations of dynamic sounds in

484 primary auditory cortex are influence by task. It is possible that less complex  
485 stimuli are resolved earlier in the hierarchy of auditory pathway (e.g., sounds that  
486 can be separated via tonotopy) whereas speech streams, which overlap both  
487 spectrally and temporally, are resolved only much later in auditory pathway.

488 It is widely accepted that an auditory scene is *perceived* in terms of  
489 auditory objects (Bregman, 1994; Griffiths and Warren, 2004; Shinn-Cunningham,  
490 2008; Shamma et al., 2011). Ding and Simon (2012a) demonstrated evidence for  
491 an object-based cortical representation of an auditory scene, but did not distinguish  
492 between early and late neural responses. This, coupled with the result here that  
493 early neural responses provide an acoustic, not object-based, representation,  
494 strongly suggest that the object-based representation emerges only in the late  
495 neural responses/higher-order (belt and parabelt) auditory areas. This is further  
496 supported by the observation that acoustic invariance, a property of object-based  
497 representation, is observed in higher order areas but not in core auditory cortex  
498 (Chang et al., 2010; Okada et al., 2010).

499 When the foreground is represented as an auditory object in late neural  
500 responses, the finding that the combined background is better reconstructed than  
501 the sum of envelopes of individual backgrounds (Figure 4B) suggests that in late  
502 neural responses the background is not represented as separated and distinct  
503 auditory objects. This result is consistent with that of Sussman et al. (2005), who

504 reported an unsegregated background when subjects attended to one of three tone  
505 streams in the auditory scene. This unsegregated background may be a result of an  
506 'analysis-by-synthesis' (Yuille and Kersten, 2006; Poeppel et al., 2008)  
507 mechanism, wherein the auditory scene is first decomposed into basic acoustic  
508 elements, followed by top-down processes that guide the synthesis of the relevant  
509 components into a single stream, which then becomes the object of attention. The  
510 remainder of the auditory scene would be the unsegregated background, which  
511 itself might have the properties of an auditory object. When attention shifts, new  
512 auditory objects are correspondingly formed, with the old ones now contributing  
513 to the unstructured background. Shamma et al. (2011) suggest that this top down  
514 influence acts through the principle of temporal coherence. Between the two  
515 opposing views, that streams are formed pre-attentively and that multiple streams  
516 can co-exist simultaneously, or that attention is required to form a stream and only  
517 that single stream is ever present as separated perceptual entity, these findings lend  
518 support to the latter.

519 In summary, these results provide evidence that, in a complex auditory  
520 scene with multiple overlapping spectral and temporal sources, the core areas of  
521 auditory cortex maintains an acoustic representation of the auditory scene with no  
522 significant preference to attended over ignored source, and with no separation into  
523 distinct sources. It is only the higher-order auditory areas that provide an object

524 based representation for the foreground, but even there the background remains  
525 unsegregated.

## 526 **References**

- 527 Ahveninen J, Hamalainen M, Jaaskelainen IP, Ahlfors SP, Huang S, Lin FH, Raij T,  
528 Sams M, Vasios CE, Belliveau JW (2011) Attention-driven auditory cortex short-  
529 term plasticity helps segregate relevant sounds from noise. *Proc Natl Acad Sci U S*  
530 *A* 108:4182-4187.
- 531 Bregman AS (1994) *Auditory scene analysis: The perceptual organization of sound*: MIT  
532 press.
- 533 Carlyon RP (2004) How the brain separates sounds. *Trends Cogn Sci* 8:465-471.
- 534 Chang EF, Rieger JW, Johnson K, Berger MS, Barbaro NM, Knight RT (2010)  
535 Categorical speech representation in human superior temporal gyrus. *Nat Neurosci*  
536 13:1428-1432.
- 537 Cherry EC (1953) Some Experiments on the Recognition of Speech, with One and with 2  
538 Ears. *Journal of the Acoustical Society of America* 25:975-979.
- 539 Chi T, Ru P, Shamma SA (2005) Multiresolution spectrotemporal analysis of complex  
540 sounds. *J Acoust Soc Am* 118:887-906.
- 541 David SV, Mesgarani N, Shamma SA (2007) Estimating sparse spectro-temporal  
542 receptive fields with natural stimuli. *Network* 18:191-212.

- 543 Davis MH, Johnsrude IS (2003) Hierarchical processing in spoken language  
544 comprehension. *J Neurosci* 23:3423-3431.
- 545 de Cheveigne A, Simon JZ (2007) Denoising based on time-shift PCA. *J Neurosci*  
546 *Methods* 165:297-305.
- 547 de Cheveigne A, Simon JZ (2008) Denoising based on spatial filtering. *J Neurosci*  
548 *Methods* 171:331-339.
- 549 de Cheveigne A, Parra LC (2014) Joint decorrelation, a versatile tool for multichannel  
550 data analysis. *Neuroimage* 98:487-505.
- 551 Di Liberto GM, O'Sullivan JA, Lalor EC (2015) Low-Frequency Cortical Entrainment to  
552 Speech Reflects Phoneme-Level Processing. *Curr Biol* 25:2457-2465.
- 553 Ding N, Simon JZ (2012a) Neural coding of continuous speech in auditory cortex during  
554 monaural and dichotic listening. *J Neurophysiol* 107:78-89.
- 555 Ding N, Simon JZ (2012b) Emergence of neural encoding of auditory objects while  
556 listening to competing speakers. *Proc Natl Acad Sci U S A* 109:11854-11859.
- 557 Fritz J, Shamma S, Elhilali M, Klein D (2003) Rapid task-related plasticity of  
558 spectrotemporal receptive fields in primary auditory cortex. *Nat Neurosci* 6:1216-  
559 1223.
- 560 Griffiths TD, Warren JD (2002) The planum temporale as a computational hub. *Trends*  
561 *Neurosci* 25:348-353.

- 562 Griffiths TD, Warren JD (2004) What is an auditory object? *Nature Reviews*  
563 *Neuroscience* 5:887-892.
- 564 Hickok G, Poeppel D (2007) The cortical organization of speech processing. *Nat Rev*  
565 *Neurosci* 8:393-402.
- 566 Inui K, Okamoto H, Miki K, Gunji A, Kakigi R (2006) Serial and parallel processing in  
567 the human auditory cortex: a magnetoencephalographic study. *Cereb Cortex* 16:18-  
568 30.
- 569 Kaas JH, Hackett TA (2000) Subdivisions of auditory cortex and processing streams in  
570 primates. *Proc Natl Acad Sci U S A* 97:11793-11799.
- 571 Kayser C, Wilson C, Safaai H, Sakata S, Panzeri S (2015) Rhythmic auditory cortex  
572 activity at multiple timescales shapes stimulus-response gain and background firing.  
573 *J Neurosci* 35:7750-7762.
- 574 Kerlin JR, Shahin AJ, Miller LM (2010) Attentional gain control of ongoing cortical  
575 speech representations in a "cocktail party". *J Neurosci* 30:620-628.
- 576 Lalor EC, Power AJ, Reilly RB, Foxe JJ (2009) Resolving precise temporal processing  
577 properties of the auditory system using continuous stimuli. *J Neurophysiol* 102:349-  
578 359.
- 579 Lutkenhoner B, Mosher JC (2007) Source Analysis of Auditory Evoked Potentials and  
580 Fields. In: *Auditory evoked potentials : basic principles and clinical application*

- 581 (Burkard RF, Eggermont JJ, Don M, eds), pp xix, 731 p., 716 p. of plates.  
582 Philadelphia: Lippincott Williams & Wilkins.
- 583 McDermott JH (2009) The cocktail party problem. *Curr Biol* 19:R1024-1027.
- 584 Mesgarani N, Chang EF (2012) Selective cortical representation of attended speaker in  
585 multi-talker speech perception. *Nature* 485:233-236.
- 586 Mesgarani N, David SV, Fritz JB, Shamma SA (2009) Influence of context and behavior  
587 on stimulus reconstruction from neural activity in primary auditory cortex. *J*  
588 *Neurophysiol* 102:3329-3339.
- 589 Nelken I, Bar-Yosef O (2008) Neurons and objects: the case of auditory cortex. *Front*  
590 *Neurosci* 2:107-113.
- 591 Ng BS, Schroeder T, Kayser C (2012) A precluding but not ensuring role of entrained  
592 low-frequency oscillations for auditory perception. *J Neurosci* 32:12268-12276.
- 593 Nourski KV, Steinschneider M, McMurray B, Kovach CK, Oya H, Kawasaki H, Howard  
594 MA, 3rd (2014) Functional organization of human auditory cortex: investigation of  
595 response latencies through direct recordings. *Neuroimage* 101:598-609.
- 596 Nourski KV, Reale RA, Oya H, Kawasaki H, Kovach CK, Chen H, Howard MA, 3rd,  
597 Brugge JF (2009) Temporal envelope of time-compressed speech represented in the  
598 human auditory cortex. *J Neurosci* 29:15564-15574.

- 599 O'Sullivan JA, Power AJ, Mesgarani N, Rajaram S, Foxe JJ, Shinn-Cunningham BG,  
600 Slaney M, Shamma SA, Lalor EC (2015) Attentional Selection in a Cocktail Party  
601 Environment Can Be Decoded from Single-Trial EEG. *Cereb Cortex* 25:1697-1706.
- 602 Okada K, Rong F, Venezia J, Matchin W, Hsieh IH, Saberi K, Serences JT, Hickok G  
603 (2010) Hierarchical organization of human auditory cortex: evidence from acoustic  
604 invariance in the response to intelligible speech. *Cereb Cortex* 20:2486-2495.
- 605 Okamoto H, Stracke H, Bermudez P, Pantev C (2011) Sound processing hierarchy within  
606 human auditory cortex. *Journal of Cognitive Neuroscience* 23:1855-1863.
- 607 Overath T, McDermott JH, Zarate JM, Poeppel D (2015) The cortical analysis of speech-  
608 specific temporal structure revealed by responses to sound quilts. *Nat Neurosci*  
609 18:903-911.
- 610 Pasley BN, David SV, Mesgarani N, Flinker A, Shamma SA, Crone NE, Knight RT,  
611 Chang EF (2012) Reconstructing speech from human auditory cortex. *PLoS Biol*  
612 10:e1001251.
- 613 Peelle JE, Johnsrude IS, Davis MH (2010) Hierarchical processing for speech in human  
614 auditory cortex and beyond. *Front Hum Neurosci* 4:51.
- 615 Poeppel D, Idsardi WJ, van Wassenhove V (2008) Speech perception at the interface of  
616 neurobiology and linguistics. *Philos Trans R Soc Lond B Biol Sci* 363:1071-1086.



- 617 Power AJ, Foxe JJ, Forde EJ, Reilly RB, Lalor EC (2012) At what time is the cocktail  
618 party? A late locus of selective attention to natural speech. *Eur J Neurosci* 35:1497-  
619 1503.
- 620 Rauschecker JP, Scott SK (2009) Maps and streams in the auditory cortex: nonhuman  
621 primates illuminate human speech processing. *Nat Neurosci* 12:718-724.
- 622 Recanzone GH, Guard DC, Phan ML (2000) Frequency and intensity response properties  
623 of single neurons in the auditory cortex of the behaving macaque monkey. *J*  
624 *Neurophysiol* 83:2315-2331.
- 625 Rouder JN, Speckman PL, Sun D, Morey RD, Iverson G (2009) Bayesian t tests for  
626 accepting and rejecting the null hypothesis. *Psychon Bull Rev* 16:225-237.
- 627 Särelä J, Valpola H (2005) Denoising source separation. *Journal of Machine Learning*  
628 *Research* 6:233-272.
- 629 Schroeder CE, Lakatos P (2009) Low-frequency neuronal oscillations as instruments of  
630 sensory selection. *Trends Neurosci* 32:9-18.
- 631 Shamma SA, Elhilali M, Micheyl C (2011) Temporal coherence and attention in auditory  
632 scene analysis. *Trends Neurosci* 34:114-123.
- 633 Shinn-Cunningham BG (2008) Object-based auditory and visual attention. *Trends Cogn*  
634 *Sci* 12:182-186.

- 635 Steinschneider M, Liégeois-Chauvel C, Brugge JF (2011) Auditory evoked potentials and  
636 their utility in the assessment of complex sound processing. In: *The auditory cortex*,  
637 pp 535-559: Springer.
- 638 Steinschneider M, Nourski KV, Rhone AE, Kawasaki H, Oya H, Howard MA, 3rd  
639 (2014) Differential activation of human core, non-core and auditory-related cortex  
640 during speech categorization tasks as revealed by intracranial recordings. *Front*  
641 *Neurosci* 8:240.
- 642 Sussman ES, Bregman AS, Wang WJ, Khan FJ (2005) Attentional modulation of  
643 electrophysiological activity in auditory cortex for unattended sounds within  
644 multistream auditory environments. *Cogn Affect Behav Neurosci* 5:93-110.
- 645 Sweet RA, Dorph-Petersen KA, Lewis DA (2005) Mapping auditory core, lateral belt,  
646 and parabelt cortices in the human superior temporal gyrus. *J Comp Neurol*  
647 491:270-289.
- 648 Yuille A, Kersten D (2006) Vision as Bayesian inference: analysis by synthesis? *Trends*  
649 *in cognitive sciences* 10:301-308.
- 650 Zion Golumbic E, Cogan GB, Schroeder CE, Poeppel D (2013a) Visual input enhances  
651 selective speech envelope tracking in auditory cortex at a "cocktail party". *J*  
652 *Neurosci* 33:1417-1426.

- 653 Zion Golumbic EM, Poeppel D, Schroeder CE (2012) Temporal context in speech  
654 processing and attentional stream selection: a behavioral and neural perspective.  
655 Brain Lang 122:151-161.
- 656 Zion Golumbic EM, Ding N, Bickel S, Lakatos P, Schevon CA, McKhann GM,  
657 Goodman RR, Emerson R, Mehta AD, Simon JZ, Poeppel D, Schroeder CE (2013b)  
658 Mechanisms underlying selective neuronal tracking of attended speech at a "cocktail  
659 party". Neuron 77:980-991.
- 660

661 **Legend:**

662 Figure 1: Illustrations of different decoding- and encoding-based neural  
663 representations of the auditory scene and its constituents. (*Left*) Examples of  
664 predicted MEG neural response using the Early-late model (red) and the  
665 Summation model (magenta) superimposed on actual MEG response (black). The  
666 proposed Early-late model prediction shows higher correlation with the actual  
667 MEG neural response than Summation model. (*Right*) Example of speech  
668 envelopes reconstructed (grey) from their late neural responses, for both the  
669 foreground and the background, superimposed on actual speech envelopes of  
670 foreground (blue) and background (cyan). The foreground reconstruction shows  
671 higher correlation with the actual foreground envelope, compared to the  
672 background reconstruction with the actual background envelope. All examples are  
673 grand averages across subjects (3 seconds duration).

674

675 Figure 2: Early vs. late MEG neural responses to a continuous speech stimulus. A  
676 sample stimulus envelope and multi-channel MEG recordings are shown in red  
677 and black respectively. The two grey vertical lines indicate two arbitrary time  
678 points at  $t - \Delta t$  and  $t$ . The dashed and dotted boxes represent the early and late  
679 MEG neural responses to stimulus at time point  $t$  respectively. The reconstruction

680 of the stimulus envelope at time  $t$  can be based on either early or late neural  
681 responses, and the separate reconstructions can be compared against each other.

682

683

684 Figure 3: Stimulus envelope reconstruction accuracy using *early* neural responses.

685 **A.** Scatter plot of reconstruction accuracy of the foreground vs. individual

686 background envelopes. No significant difference was observed ( $p = 0.21$ ), and

687 therefore no preferential representation of the foreground speech over the

688 individual background streams is revealed in early neural responses. **B.** Scatter

689 plot of reconstruction accuracy of the envelope of the entire acoustic scene vs. that

690 of the sum of the envelopes of all three individual speech streams. The acoustic

691 scene is reconstructed more accurately (visually, most of data points fall above the

692 diagonal) as a whole than as the sum of individual components in early neural

693 responses ( $p < 2 \times 10^{-6}$ ). Reconstruction accuracy is measured by proportion of the

694 variance explained: the square of the Pearson correlation coefficient between the

695 actual and predicted envelopes.

696

697 Figure 4: Stimulus envelope reconstruction accuracy using *late* neural responses.

698 **A.** Scatter plot of accuracy between foreground vs. individual background

699 envelope reconstructions demonstrates that the foreground is represented with

700 dramatically better fidelity (visually, most of data points fall above the diagonal)  
701 than the background speech, in late neural responses ( $p < 2 \times 10^{-6}$ ). **B.** Scatter plot  
702 of the reconstruction accuracy of the envelope of the entire background vs. that of  
703 the sum of the envelopes of the two individual background speech streams. The  
704 background scene is reconstructed more accurately as a monolithic background  
705 than as separated individual background streams in late neural responses ( $p =$   
706 0.012)

707

708 Figure 5: MEG response prediction accuracy. Scatter plot of the accuracy of  
709 predicted MEG neural response for the proposed Early-late model vs. the standard  
710 Summation model. The Early-late model predicts the MEG neural response  
711 dramatically better (visually, most of data points fall above the diagonal) than the  
712 Summation model ( $p < 2 \times 10^{-6}$ ). The accuracy of predicted MEG neural  
713 responses is measured by proportion of the variance explained: the square of the  
714 Pearson correlation coefficient between the actual and predicted responses.  
715

**Neural response prediction from stimulus**      **Stimulus reconstruction from neural response**

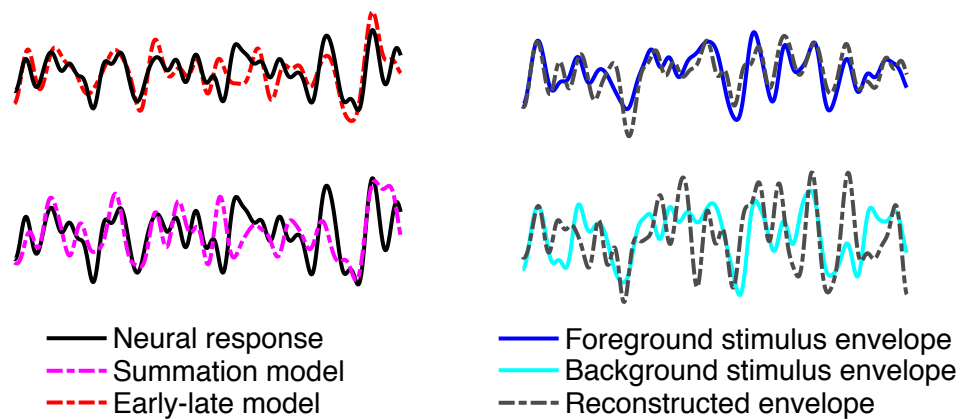

716

717

718 Figure 1

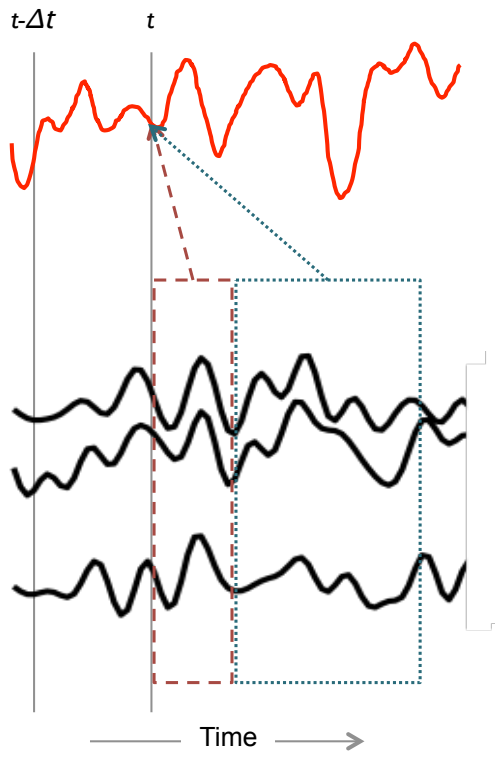

719

720

721 Figure 2



Stimulus Reconstruction Accuracy from **Early** Neural Responses

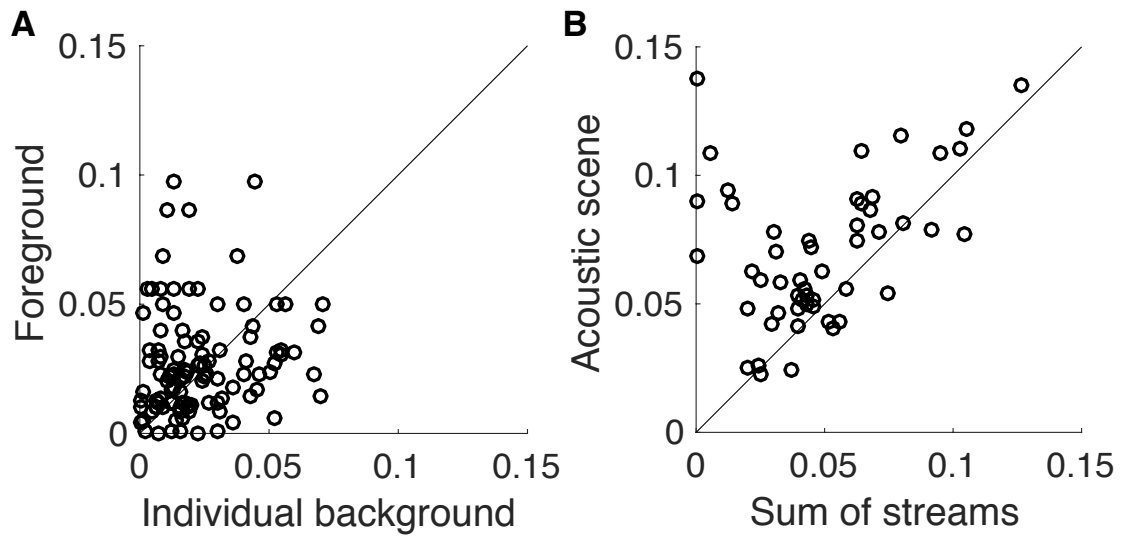

722

723

724 Figure 3

# Stimulus Reconstruction Accuracy from **Late** Neural Responses

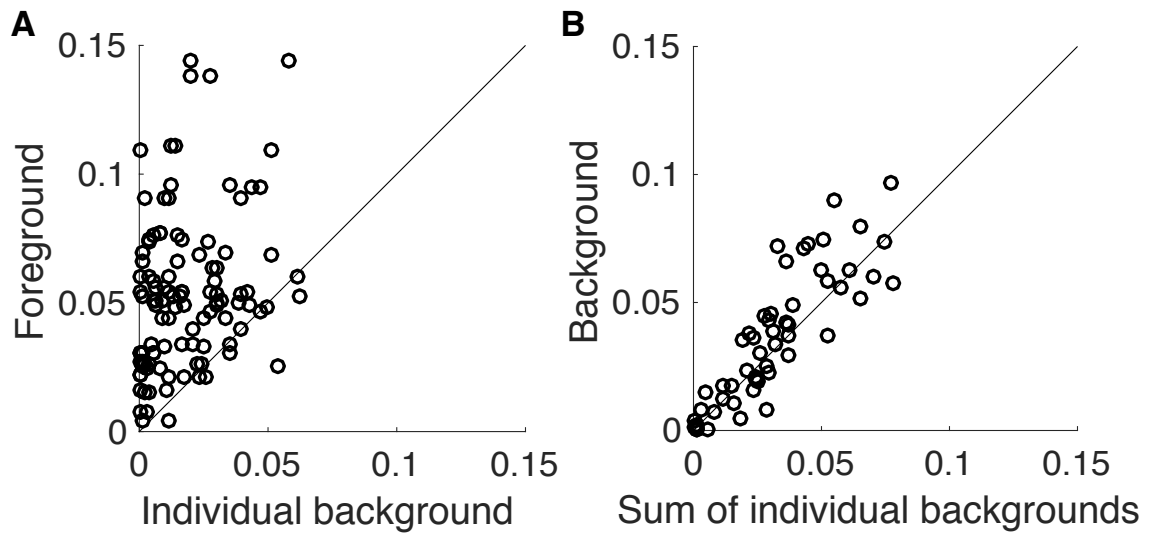

725

726

727 Figure 4

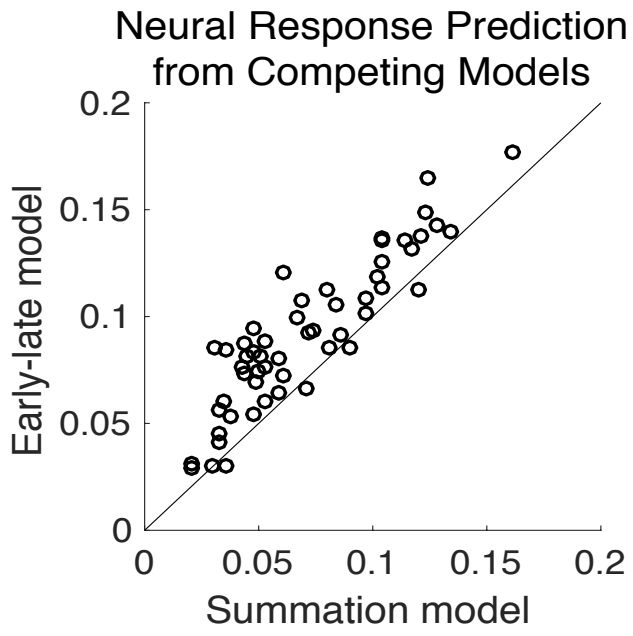

728

729

730 Figure 5
